# Supplementary material
Source: PubMed Central journal article supplement (PMC5003327)
Supplement: 10.1164_rccm.201507-1491OC_harris_data_supplement.pdf [file 10.1164_rccm.201507-1491OC_harris_data_supplement.pdf]

## Online Data Supplement

**Title: Gut microbiota predict pulmonary infiltrates after allogeneic hematopoietic cell transplantation**

**Author list:** Bianca Harris, Sejal M. Morjaria, Eric R. Littmann, Alexander I. Geyer, Diane E. Stover, Juliet N. Barker, Sergio A. Giralto, Ying Taur, and Eric G. Pamer

### Methods

#### *Defining the primary clinical endpoint*

The primary endpoint, PC, employed a broad clinical-radiographic definition. It required a clinical indication for chest imaging (respiratory symptoms, e.g. cough, dyspnea, and/or abnormal vital signs, e.g. fever, hypoxia) and the development of a radiographic parenchymal abnormality that correlated clinically and influenced management. The operational procedure involved independent chart review by two study physicians (one pulmonary and one infectious diseases specialist) on each of the 94 subjects. First, this entailed manual extraction and review of radiographic findings, as described by the clinical radiologist in the electronic medical record (EMR), from all diagnostic chest images obtained from each subject between transplant hospitalization and study end, or death. When a study was identified as having any new parenchymal abnormality on CT or x-ray (only if CT was unavailable, as in 18/112 PC events), information regarding indication for imaging, radiographic patterns, subsequent diagnostic work-up, and therapeutic management were reviewed. In almost all cases, it was clear when a study was performed for fever or for respiratory complaints. Abnormal parenchymal findings,

as documented by the clinical radiologist in the EMR, were only deemed to be relevant to a PC if the transplant physician caring for the patient elicited a treatment plan based on these findings and the clinical picture.

Specific diagnoses were assigned to PC events only if supportive diagnostic results (Table 3) corroborated with the transplant provider's clinical impression, as documented in the EMR. PCs thought due to volume overload or cardiogenic pulmonary edema (as defined by radiographic appearance, supportive echocardiogram and/or BNP data, and stated as such in the EMR) were excluded when considered isolated explanations for the presenting respiratory signs or symptoms. Only a few cases were excluded on this basis. An impression of atelectasis by the clinical radiologist was also excluded if considered incidental (e.g. fever work-up but no respiratory complaints, with subsequent identification of an extra-pulmonary fever source); however, an infiltrate initially identified as atelectasis in a patient with hypoxia that clearly evolved into pneumonia on repeat imaging was considered a PC. This occurred in 3 cases, highlighting the importance of clinical correlation.

After PCs were identified, a detailed review of the clinical data and provider notes surrounding each PC event was repeated. Adjudication by two other study physicians (one pulmonary and one infectious disease specialist) was performed for complex cases.

### *Microbiota analysis*

According to previously published methods by Taur *et al*, serial fecal specimens were collected from each patient during transplant hospitalization, beginning with pre-transplant conditioning (up to 15 days before stem cell infusion) until 35 days post-transplant or hospital discharge<sup>6</sup>.

Following DNA extraction and purification from each specimen, the V1-V3 region of the 16s rRNA gene was amplified by polymerase chain reaction (PCR) using modified universal bacterial primers. Purified PCR products were sequenced on a 454 GS FLX Titanium platform. Sequences were filtered, aligned to the full-length 16s rRNA gene, and grouped into operational taxonomic units of 97% similarity according to our described methods<sup>6,9</sup>.

Microbiota predictors were included in the time-dependent analysis from day 0 forward (not the start of pre-transplant conditioning, e.g. day -10, as in the prior analysis). A “baseline” microbiota specimen was defined as the fecal specimen collected just prior to day 0, and not the first specimen obtained upon hospitalization for transplant. Thus baseline microbiota characteristics, such as low diversity, do not necessarily reflect pre-hospitalization conditions in this study, since all patients would have received at least some antimicrobials for prophylaxis prior to HCT. However, as shown by Taur *et al*, fecal microbiota from this cohort had a largely diverse, non-dominant baseline at the time of transplant hospitalization, and gut microbial composition shifted rapidly upon exposure to transplant-related treatments soon after admission<sup>6</sup>.

## Results

### *Clinical observations regarding Enterococcus faecium as a potential respiratory pathogen*

There were two interesting clinical scenarios pertaining to Enterococcus and PCs, as suggested in the footnote to Table 3. In both subjects, fecal domination by *E faecium* preceded the development of a PC, but in only one case was there contemporaneous identification of Vancomycin-resistant *Enterococcus faecium* (VRE) in blood to suggest translocation as a

possible mechanism. In this case, chest CT findings were suspicious for septic emboli in a subject with fever, dyspnea and blood culture positive for VRE. This was thought to explain his multi-focal pneumonia, supported further by improvement after targeted treatment of VRE.

The second subject underwent diagnostic bronchoscopy to evaluate diffuse infiltrates in the setting of fever and hypoxia. Examination of bronchoalveolar lavage fluid (BAL) was consistent with diffuse alveolar hemorrhage (DAH); however endobronchial biopsy was performed on an unexpected airway lesion, and tissue culture revealed VRE (BAL cultures were non-diagnostic). The leading differential diagnosis for the diffuse process in this case was inflammatory, e.g. IPS, but treatment was nonetheless directed at VRE given the degree of acuity and immunocompromise. It is unclear whether or not VRE was contributory.

## **Discussion**

### *Pulmonary complications as a clinical endpoint*

There is no formal validated or reproduced approach to defining combined clinical and radiographic endpoints for lung injury in these complex HCT patients. Presenting signs, symptoms and radiographic findings associated with pulmonary processes are highly variable, due in large part to heterogeneous inflammatory responses during pre-and peri-engraftment periods, as well as myriad co-morbidities. The HCT literature is generally comprised of small, retrospective cohort or case control studies limited to patient subgroups (e.g. umbilical cord blood recipients) or diagnostic categories (e.g. fungal pneumonia).

For this study, a broad clinical and radiographic definition for PCs was considered an acceptable approach given imprecise diagnostic and interpretive algorithms for defining PCs in

subjects with hematological malignancies, HCT or other immunocompromised states. For this study, case selection was not limited to a specific presentation (e.g. hypoxia) or radiographic pattern (e.g. nodular infiltrates), in order to provide an overview of clinical landscape.

**Table E1.** Gut microbiota states during transplant hospitalization by mortality status

| <b>Microbiota State</b>                 | <b><u>Dead</u></b> | <b><u>Alive</u></b> |
|-----------------------------------------|--------------------|---------------------|
|                                         | n=48 (51.0%)       | n=46 (48.9%)        |
| <b><u>Taxon Domination*</u></b>         |                    |                     |
| Gammaproteobacteria <sup>  </sup>       | 9 (18.8%)          | 2 (4.3%)            |
| Enterococcus                            | 23 (47.9%)         | 15 (32.6%)          |
| Streptococcus                           | 17 (35.4%)         | 12 (26.1%)          |
| <b><u>Low Diversity<sup>†</sup></u></b> |                    |                     |
| Baseline <sup>‡</sup>                   | 7 (14.6%)          | 8 (17.4%)           |
| Engraftment <sup>§</sup>                | 28 (58.3%)         | 15 (32.6%)          |

\*Defined as relative abundance greater than 30% and the most dominant taxon in a stool specimen collected during initial transplant hospitalization (until day 35, or death).<sup>6</sup> 7/94 had a domination state at as the time of stem cell infusion (day 0).

<sup>†</sup> Low diversity as defined by Shannon Diversity Index <1.5<sup>33, 34</sup>

<sup>‡</sup>Baseline” defined as the pre-transplant specimen collected most proximal to day 0.

<sup>§</sup>2 individuals did not engraft

<sup>||</sup> Borderline statistical significance (p=0.051) using two-sided P-values and based on Fisher’s Exact Test, with a significance threshold of P<0.05

**Table E2.** Predictors of pre-engraftment PCs following allogeneic HCT

| Clinical Predictor                                 | <u>Univariate</u>  |         | <u>Multivariate</u> |         |
|----------------------------------------------------|--------------------|---------|---------------------|---------|
|                                                    | Hazard Ratio       | P-value | Hazard Ratio        | P-value |
| Age (≥60y)                                         | 0.90 (0.27 - 2.44) | 0.843   |                     |         |
| Sex (female)                                       | 2.18 (0.85 - 6.10) | 0.104   | 2.18 (0.66 - 7.77)  | 0.199   |
| Race (white vs. other)                             | 0.91 (0.33 - 3.06) | 0.867   |                     |         |
| Disease (leukemia vs. other)                       | 2.55 (0.98 - 7.64) | 0.056   | 3.05 (0.80 - 12.96) | 0.103   |
| Donor stem cell type (matched related vs. other)   | 0.47 (0.16 - 1.29) | 0.144   | 0.24 (0.03 - 2.85)  | 0.224   |
| Double Umbilical Cord                              | 2.66 (0.96 - 7.52) | 0.061   | 0.54 (0.07 - 6.97)  | 0.590   |
| T-cell depletion                                   | 0.46 (0.11 - 1.44) | 0.188   | 0.44 (0.08 - 2.19)  | 0.312   |
| Conditioning Intensity (myeloablative vs. other)   | 2.64 (0.95 - 8.01) | 0.062   | 2.26 (0.65 - 8.31)  | 0.200   |
| Busulfan                                           | 0.76 (0.19 - 2.34) | 0.654   |                     |         |
| HCT Co-morbidity Index <sup>†</sup> (≥4 vs. other) | 1.50 (0.55 - 3.85) | 0.411   |                     |         |

|                                                |                            |              |                              |              |
|------------------------------------------------|----------------------------|--------------|------------------------------|--------------|
| Disease risk <sup>‡</sup> (high vs. other)     | 1.03 (0.40 - 2.64)         | 0.950        |                              |              |
| Abnormal baseline PFTs                         | 0.95 (0.37 - 2.54)         | 0.916        |                              |              |
| Bloodstream infection*                         | 0.73 (0.14 - 2.41)         | 0.638        |                              |              |
| <b>Shannon Diversity Index<sup>§</sup></b>     | <b>3.46 (1.12 - 9.56)</b>  | <b>0.032</b> | <b>6.30 (1.42 - 31.80)</b>   | <b>0.016</b> |
| <b>&lt;1.5 at baseline</b>                     |                            |              |                              |              |
| Gamma <span>pro</span> teobacteria domination* | 0.43 (0.00 - 3.28)         | 0.504        |                              |              |
| <b>Enterococcus domination*</b>                | <b>5.72 (2.12 - 15.45)</b> | <b>0.001</b> | 1.38 (0.38 - 4.95)           | 0.625        |
| <b>Streptococcus domination*</b>               | <b>0.12 (0.00 - 0.95)</b>  | <b>0.043</b> | 0.29 (0.00 - 2.78)           | 0.342        |
| Vancomycin                                     | 3.33 (0.44 - 425.96)       | 0.310        |                              |              |
| Beta-Lactam                                    | 1.63 (0.53 - 6.56)         | 0.417        |                              |              |
| <b>Fluoroquinolone</b>                         | <b>4.11 (1.59 - 11.14)</b> | <b>0.004</b> | <b>4.24 (1.15 - 17.00)</b>   | <b>0.030</b> |
| Metronidazole                                  | 1.31 (0.40 - 3.58)         | 0.626        |                              |              |
| <b>Azithromycin</b>                            | <b>9.42 (1.02 - 39.82)</b> | <b>0.049</b> | <b>26.77 (2.20 - 226.61)</b> | <b>0.015</b> |

Statistically significant p value < 0.05

\* Time-dependent variables (note: pre-engraftment model does not include GVHD)

<sup>‡</sup> HCT Co-morbidity Index groups: low (0-1), intermediate (2-3) or high ( $\geq 4$ )<sup>30</sup>



‡ Disease Risk: ASBMT RFI Classification as low, intermediate or high<sup>29</sup>

§ Shannon Diversity Index takes into account number of species and relative abundance<sup>33</sup>

|| Vancomycin includes intravenous mode of administration only

\*\* Beta lactams include cephalosporins, beta-lactam-beta-lactamase combinations and carbapenems

Abbreviations: PFT= pulmonary function test

**Table E3.** Predictors of post-engraftment PCs following allogeneic HCT

| <b>Clinical Predictor</b>                                                 | <b><u>Univariate</u></b>  |                | <b><u>Multivariate</u></b> |                |
|---------------------------------------------------------------------------|---------------------------|----------------|----------------------------|----------------|
|                                                                           | <b>Hazard Ratio</b>       | <b>P-value</b> | <b>Hazard Ratio</b>        | <b>P-value</b> |
| Age ( $\geq 60$ y)                                                        | 1.25 (0.70 - 2.17)        | 0.444          |                            |                |
| Sex (female)                                                              | 1.10 (0.64 - 1.88)        | 0.721          |                            |                |
| Race (white vs. other)                                                    | 1.11 (0.57 - 2.42)        | 0.773          |                            |                |
| Disease (leukemia vs. other)                                              | 0.88 (0.51 - 1.50)        | 0.641          |                            |                |
| Donor stem cell type (matched related vs. other)                          | 0.93 (0.54 - 1.65)        | 0.799          |                            |                |
| Double Umbilical Cord                                                     | 0.85 (0.40 - 1.61)        | 0.632          |                            |                |
| T-cell depletion                                                          | 1.05 (0.62 - 1.79)        | 0.854          |                            |                |
| Conditioning Intensity (myeloablative vs. other)                          | 0.88 (0.52 - 1.50)        | 0.650          |                            |                |
| Busulfan                                                                  | 1.57 (0.90 - 2.69)        | 0.111          | 1.45 (0.74 - 2.78)         | 0.274          |
| <b>HCT Co-morbidity Index<sup>†</sup> (<math>\geq 4</math> vs. other)</b> | <b>2.49 (1.40 - 4.30)</b> | <b>0.002</b>   | <b>2.37 (1.25 - 4.42)</b>  | <b>0.009</b>   |
| Disease risk <sup>‡</sup> (high vs. other)                                | 1.53 (0.90 - 2.64)        | 0.115          | 1.36 (0.71 - 2.60)         | 0.353          |

|                                            |                           |              |                           |              |
|--------------------------------------------|---------------------------|--------------|---------------------------|--------------|
| <b>Abnormal baseline PFTs</b>              | <b>2.01 (1.16 - 3.62)</b> | <b>0.013</b> | 1.49 (0.79 - 2.89)        | 0.219        |
| Acute GVHD (Day 0 to 100)*                 | 1.54 (0.79 - 2.89)        | 0.198        | 1.64 (0.78 - 3.39)        | 0.189        |
| Bloodstream infection*                     | 1.27 (0.73 - 2.18)        | 0.394        |                           |              |
| <b>Shannon Diversity Index<sup>§</sup></b> | <b>0.77 (0.32 - 1.59)</b> | <b>0.507</b> |                           |              |
| <b>&lt;1.5 at baseline</b>                 |                           |              |                           |              |
| <b>Gammaproteobacteria domination*</b>     | <b>3.33 (1.43 - 6.87)</b> | <b>0.007</b> | <b>3.68 (1.49 - 8.21)</b> | <b>0.006</b> |
| Enterococcus domination*                   | 0.81 (0.45 - 1.41)        | 0.473        |                           |              |
| Streptococcus domination*                  | 1.25 (0.69 - 2.19)        | 0.447        |                           |              |
| Vancomycin <sup>*,  </sup>                 | 0.53 (0.23 - 1.54)        | 0.218        |                           |              |
| Beta-Lactam <sup>*,**</sup>                | 0.92 (0.43 - 2.42)        | 0.857        |                           |              |
| Fluoroquinolone*                           | 1.53 (0.89 - 2.66)        | 0.125        | 1.27 (0.67 - 2.44)        | 0.468        |
| Metronidazole*                             | 1.05 (0.60 - 1.80)        | 0.866        |                           |              |
| Azithromycin*                              | 1.83 (0.95 - 3.33)        | 0.071        | 1.85 (0.88 - 3.66)        | 0.103        |

**Statistically significant p value < 0.05**

\* Time-dependent variables

† HCT Co-morbidity Index groups: low (0-1), intermediate (2-3) or high ( $\geq 4$ )<sup>30</sup>

‡ Disease Risk: ASBMT RFI Classification as low, intermediate or high<sup>29</sup>

§ Shannon Diversity Index takes into account number of species and relative abundance<sup>33</sup>

|| Vancomycin includes intravenous mode of administration only

\*\* Beta lactams include cephalosporins, beta-lactam-beta-lactamase combinations and carbapenems

Abbreviations: PFT= pulmonary function test; GVHD = graft-versus-host-disease

## Figure Legend

### **Figure F1. Heat map of species belonging to the class Gammaproteobacteria identified in all specimens collected from subjects with and without PCs.**

Figure F1 is a heat map showing the log-transformed maximum relative abundance of Gammaproteobacteria species identified in all 439 stool specimens collected from 94 subjects during transplant hospitalization. Each column represents one subject, stratified by PC status. Each row represents bacterial taxa resolved to the species level. The maximum relative abundance of each species depicted takes into account all specimens from each subject (range 3-8 per subject), and does not reflect one sample collected at a single time point. The most abundant Gammaproteobacteria species identified were *E coli* and *Klebsiella spp*, including common respiratory pathogens. *Abbreviation: PC= pulmonary complication*

### **Figure F2. Alpha diversity of fecal bacterial communities identified in all stool specimens from subjects with and without PCs.**

Figure F2 shows alpha (within-sample) diversity, of bacterial communities identified in all stool specimens (n=439) from 94 subjects, as summarized by the Shannon Diversity Index (SDI; diversity increases from 0 along the Y-axis). The range of SDI values assigned to each specimen is wide, from close to 0 (not diverse) to greater than 3 (diverse) in subjects both with and without PCs. *Abbreviation: PC= pulmonary complication*

**Figure F3. Beta diversity of fecal bacterial communities, grouped by taxon-domination state and by PC status.**

Figure F3 shows beta (between-sample) diversity of bacterial communities identified in all stool specimens (n=439) collected from 94 subjects, as calculated by Bray-Curtis dissimilarity principal coordinates analysis. Principal coordinate 1 (PC1, x-axis) explains 54.1% of variance, and principal coordinate 2 (PC2, Y-axis) explains 19.5% of the variation in Bray-Curtis dissimilarity between samples grouped by PC status (shape: triangle = PC, circle = no PC) and by taxon domination state (color: red=Proteobacteria, green=Enterococcus, tan=Streptococcus and grey= other dominant taxa or specimens collected outside of the analysis period). Clustering of PCs by domination state is most apparent in the setting of Proteobacteria domination (red triangles) and in a subset of subjects with Enterococcus domination (green triangles). *Abbreviation: PC= pulmonary complication*

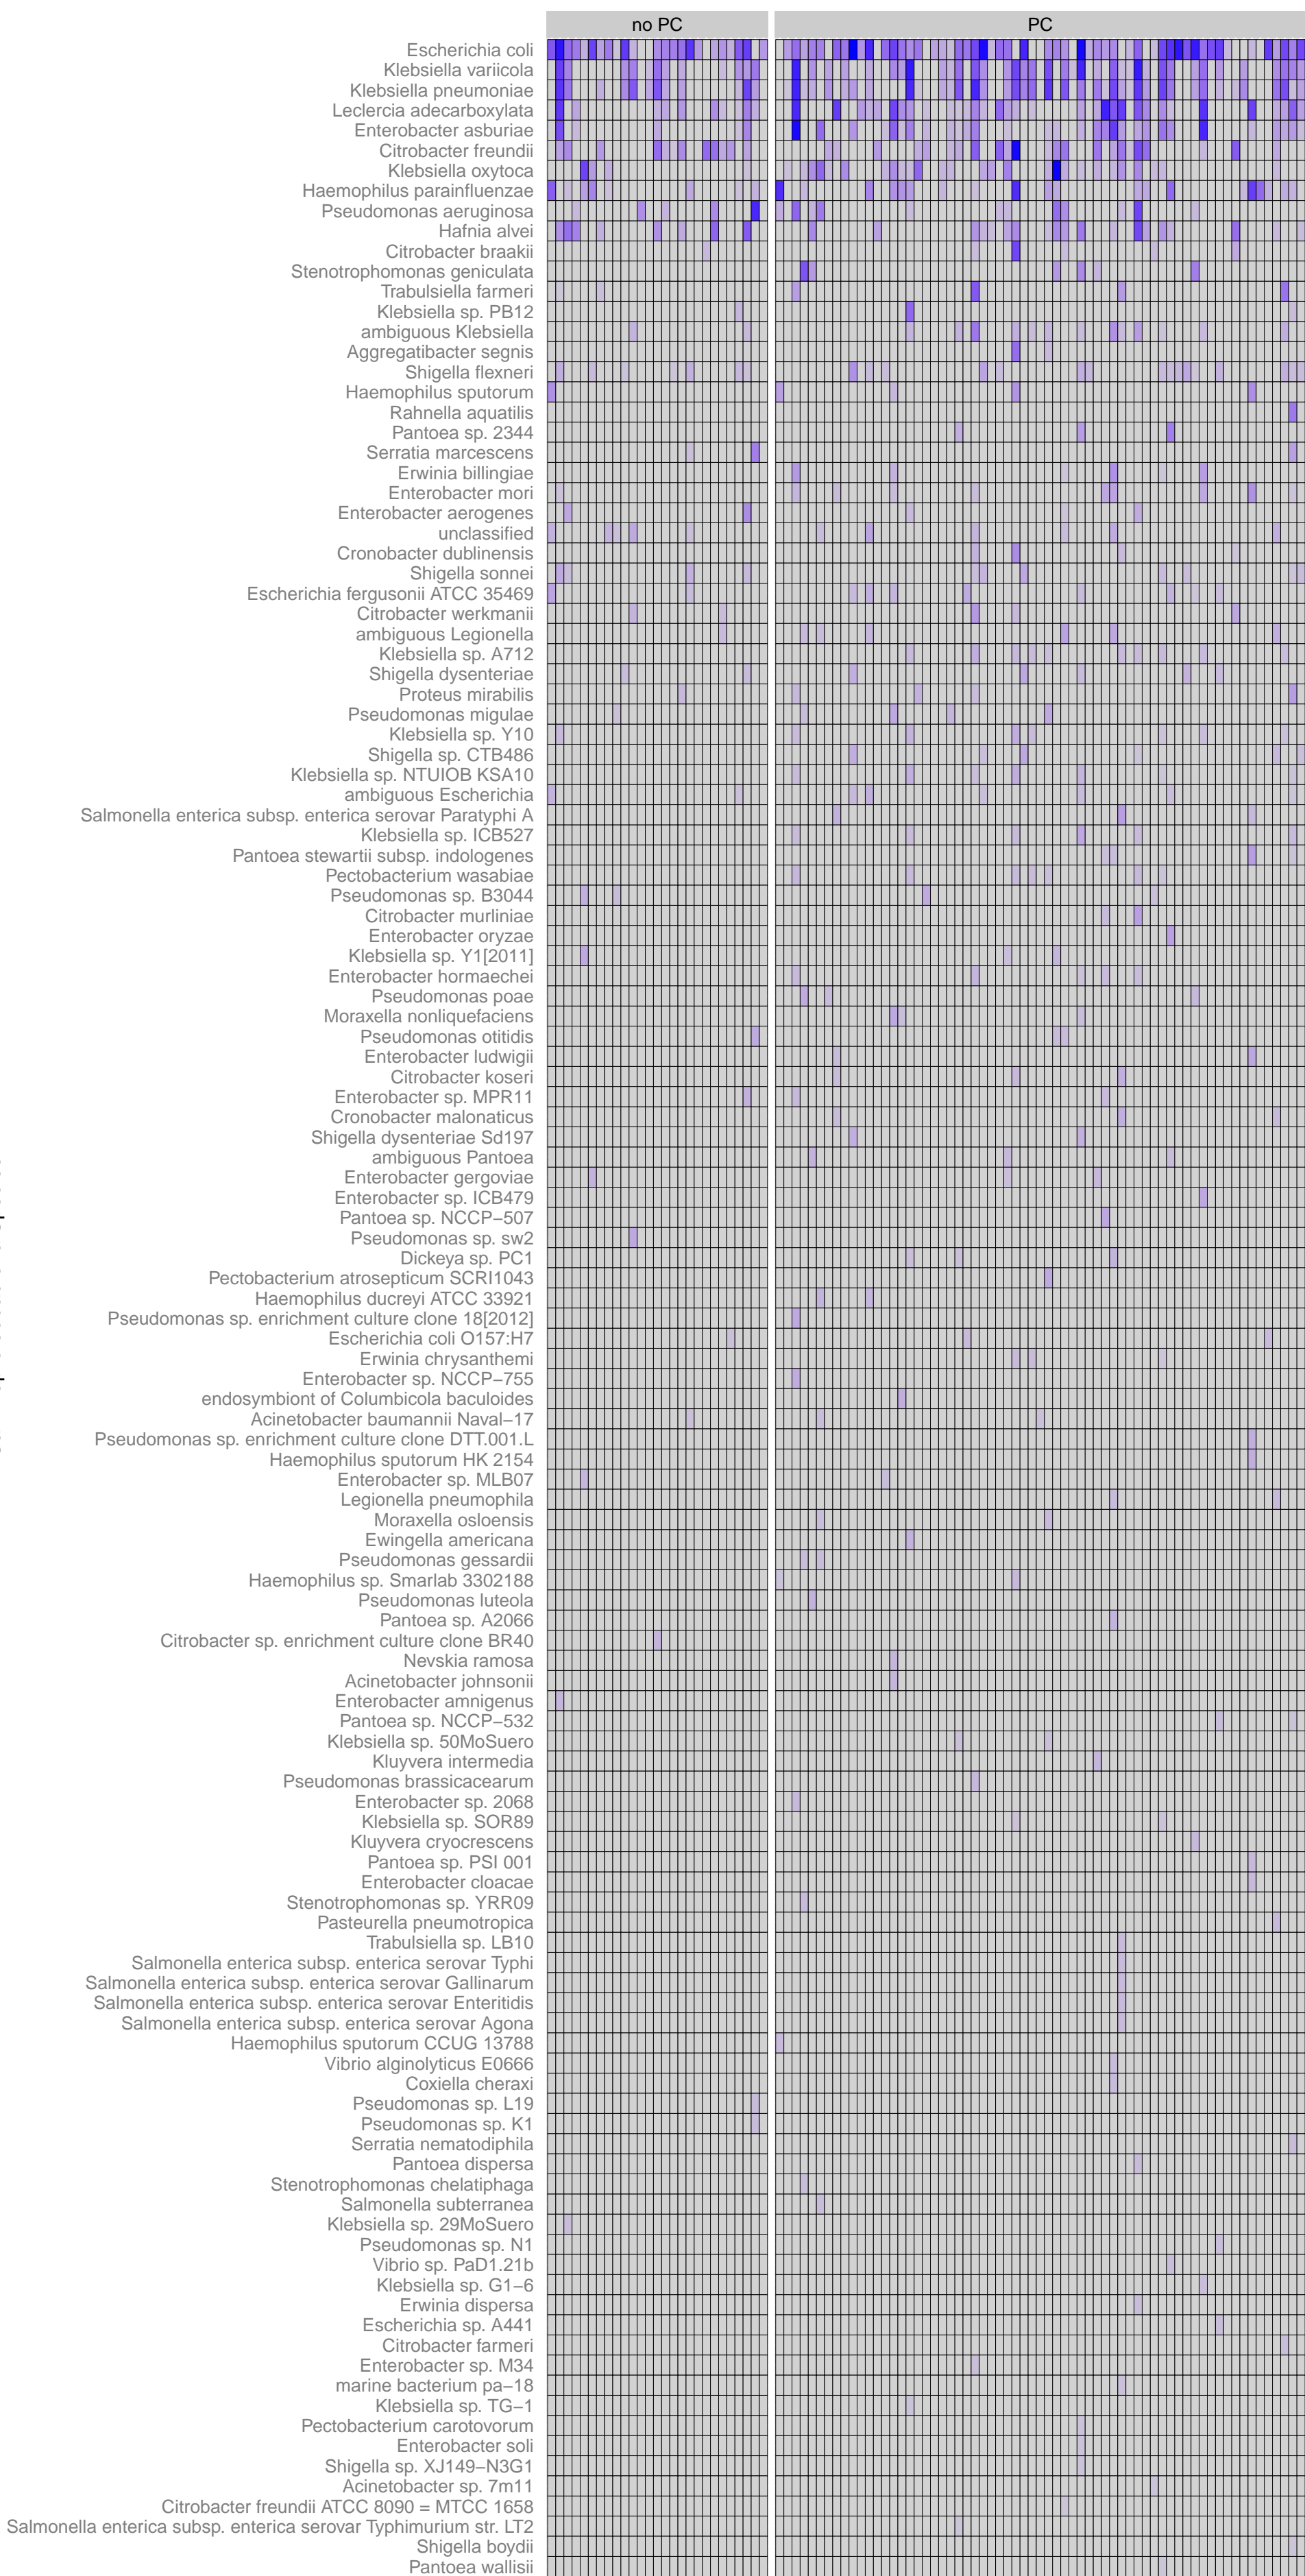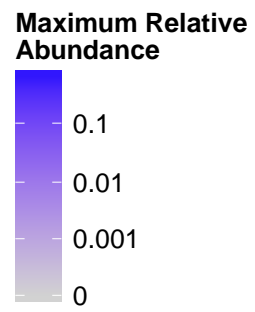

Figure F1

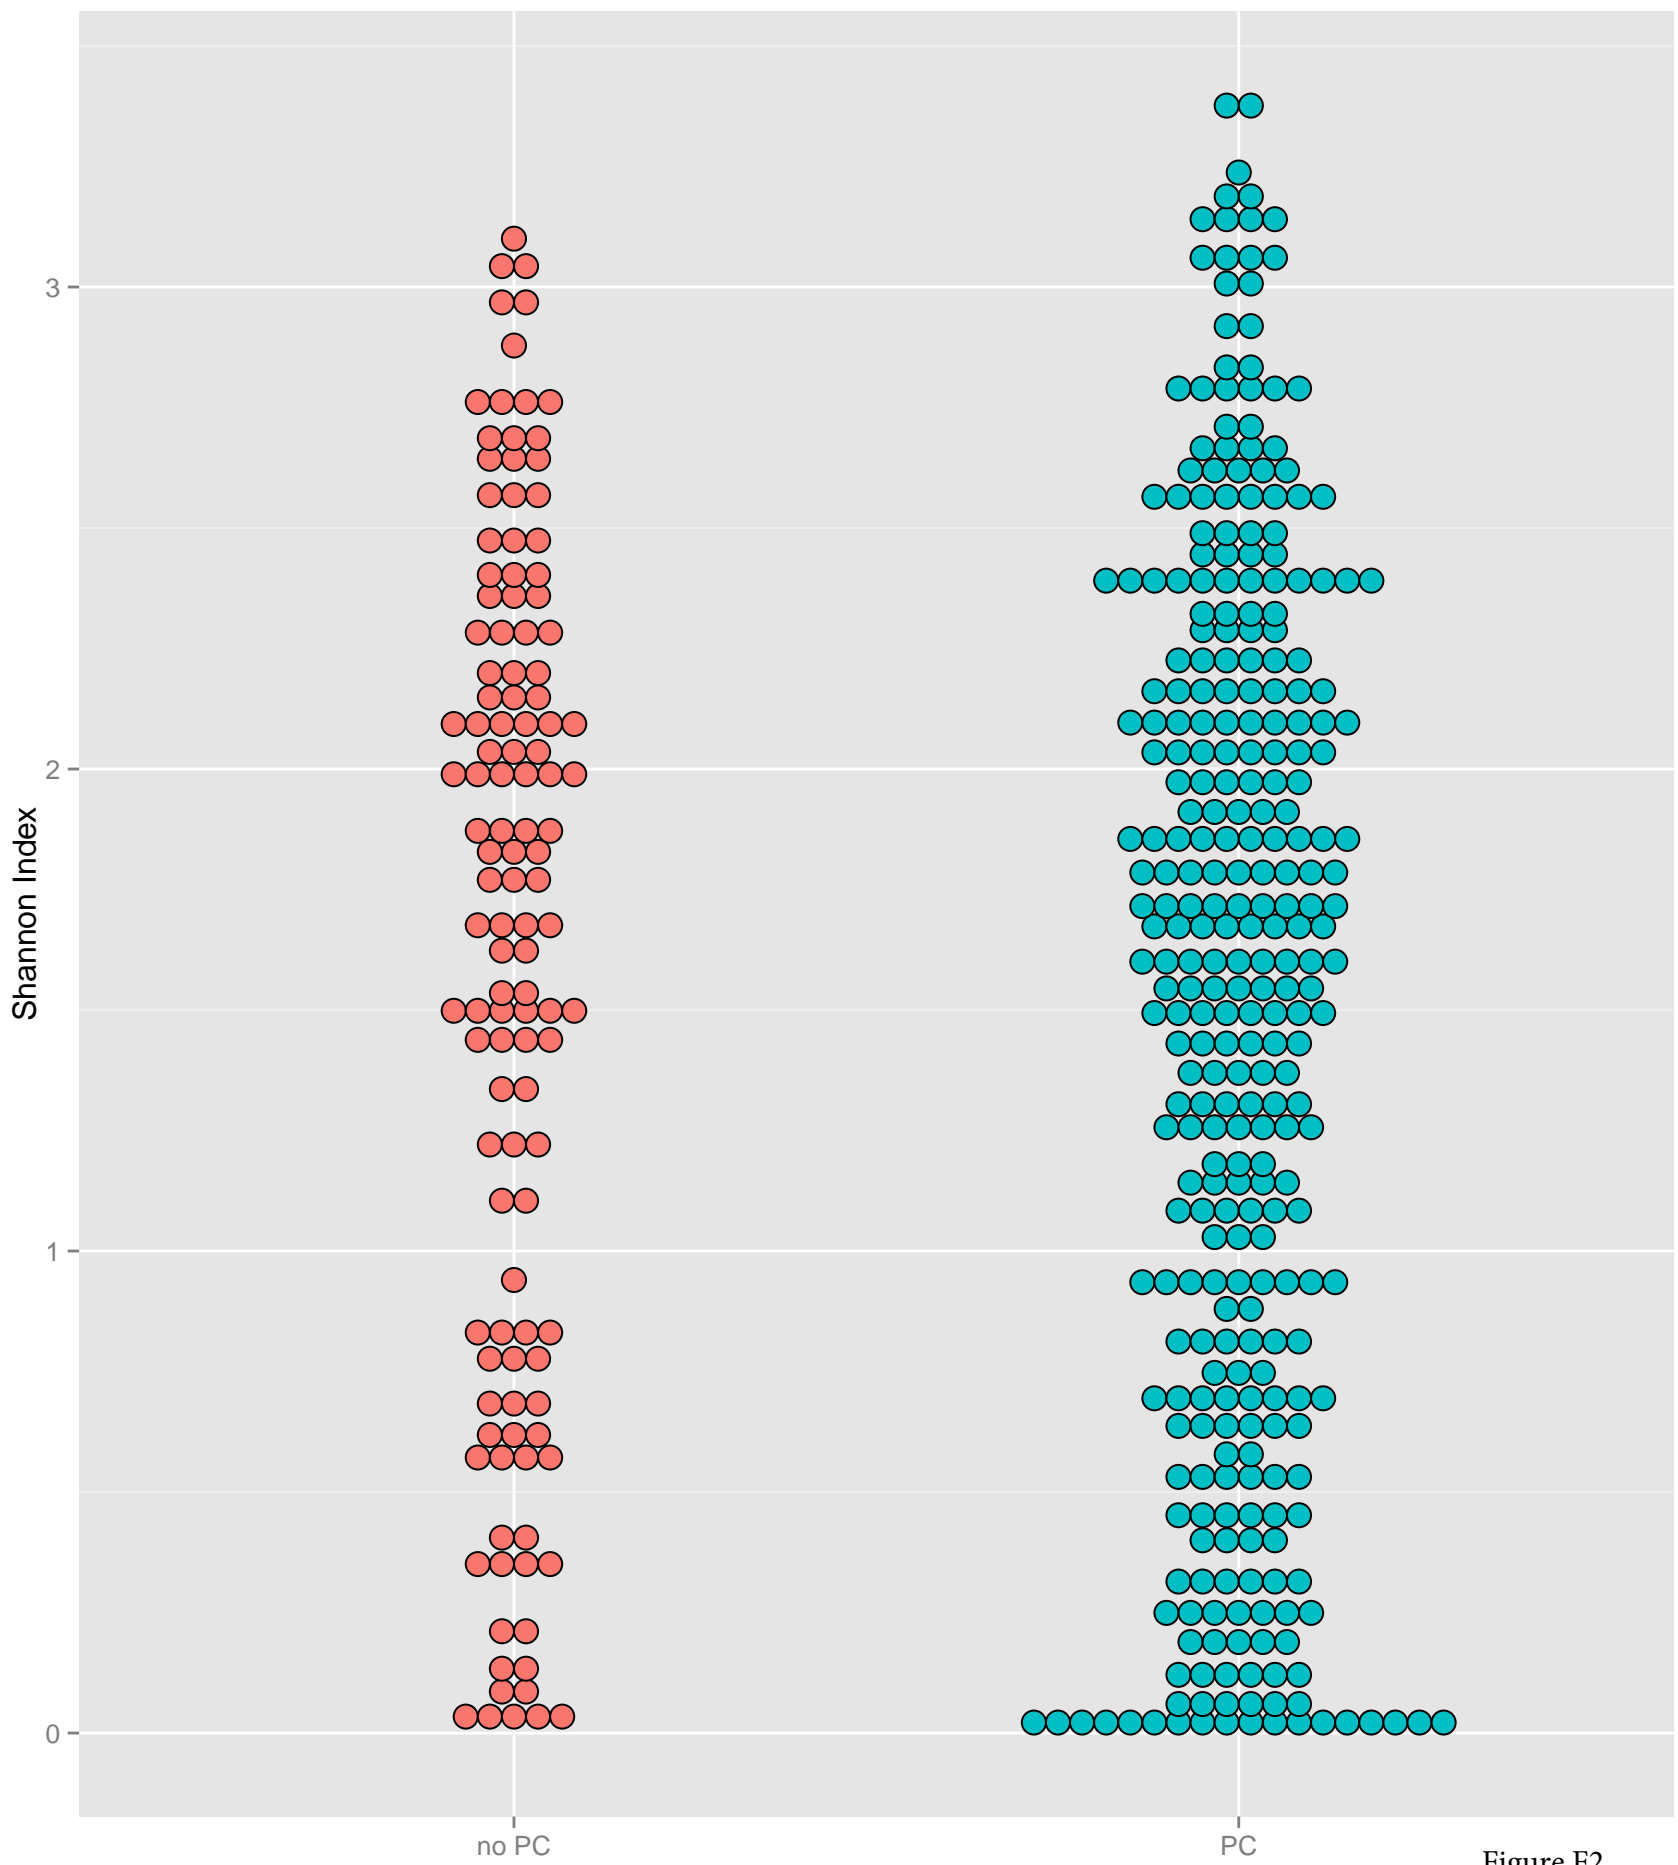

Figure F2



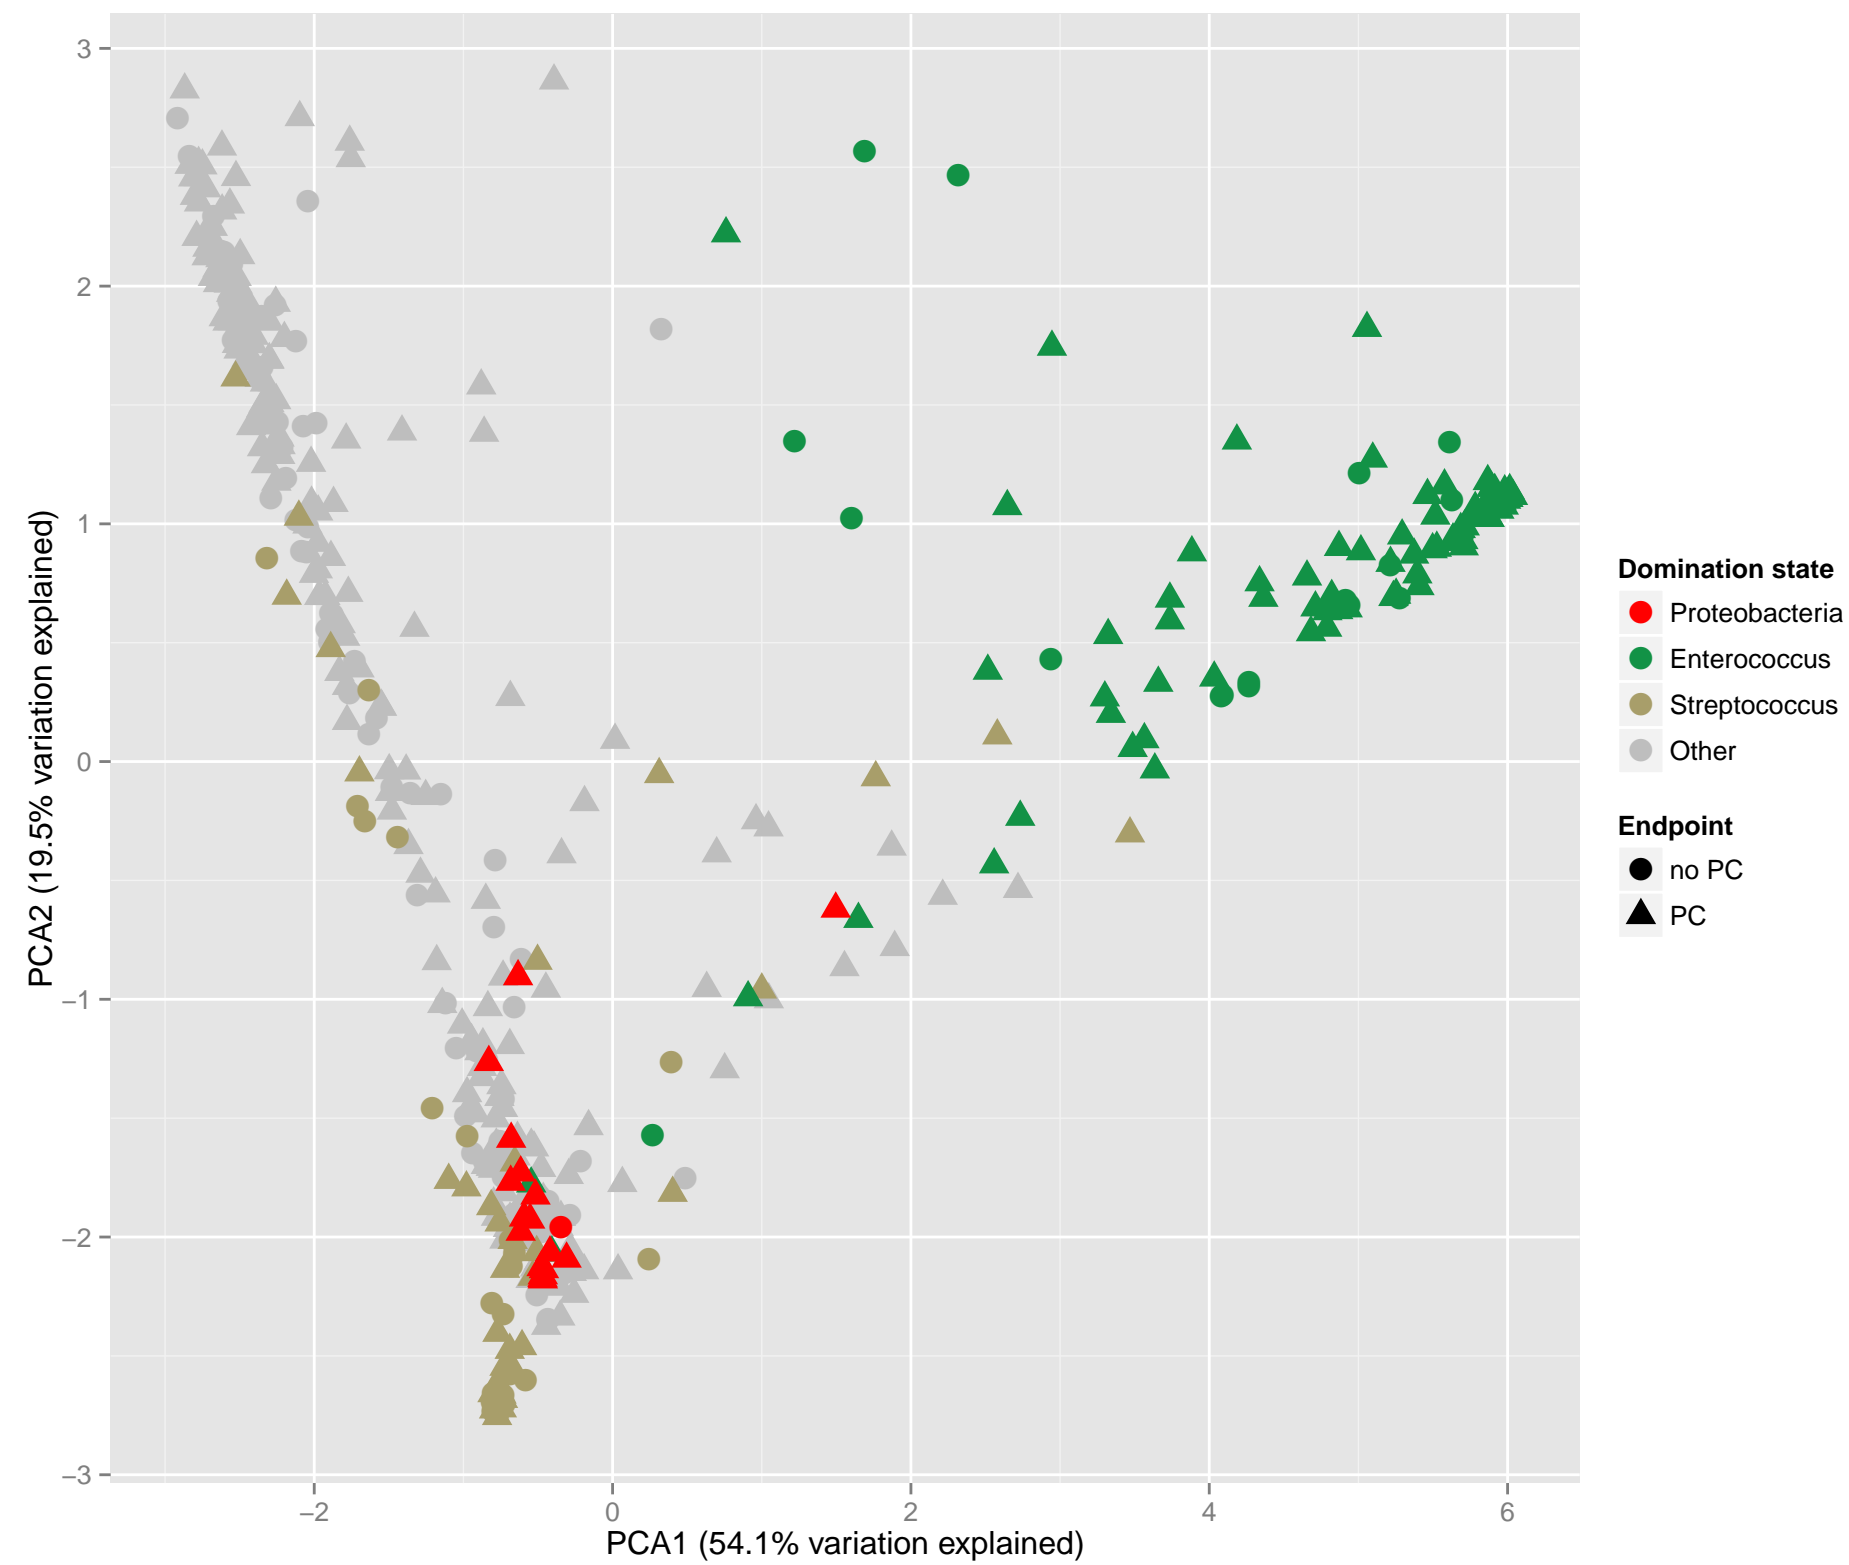

Figure F3
